# Supplementary material
Source: publisher figshare collection journal article supplement (https://tandf.figshare.com/articles/dataset/_/24093751)

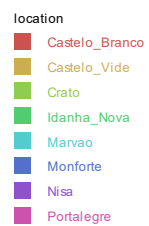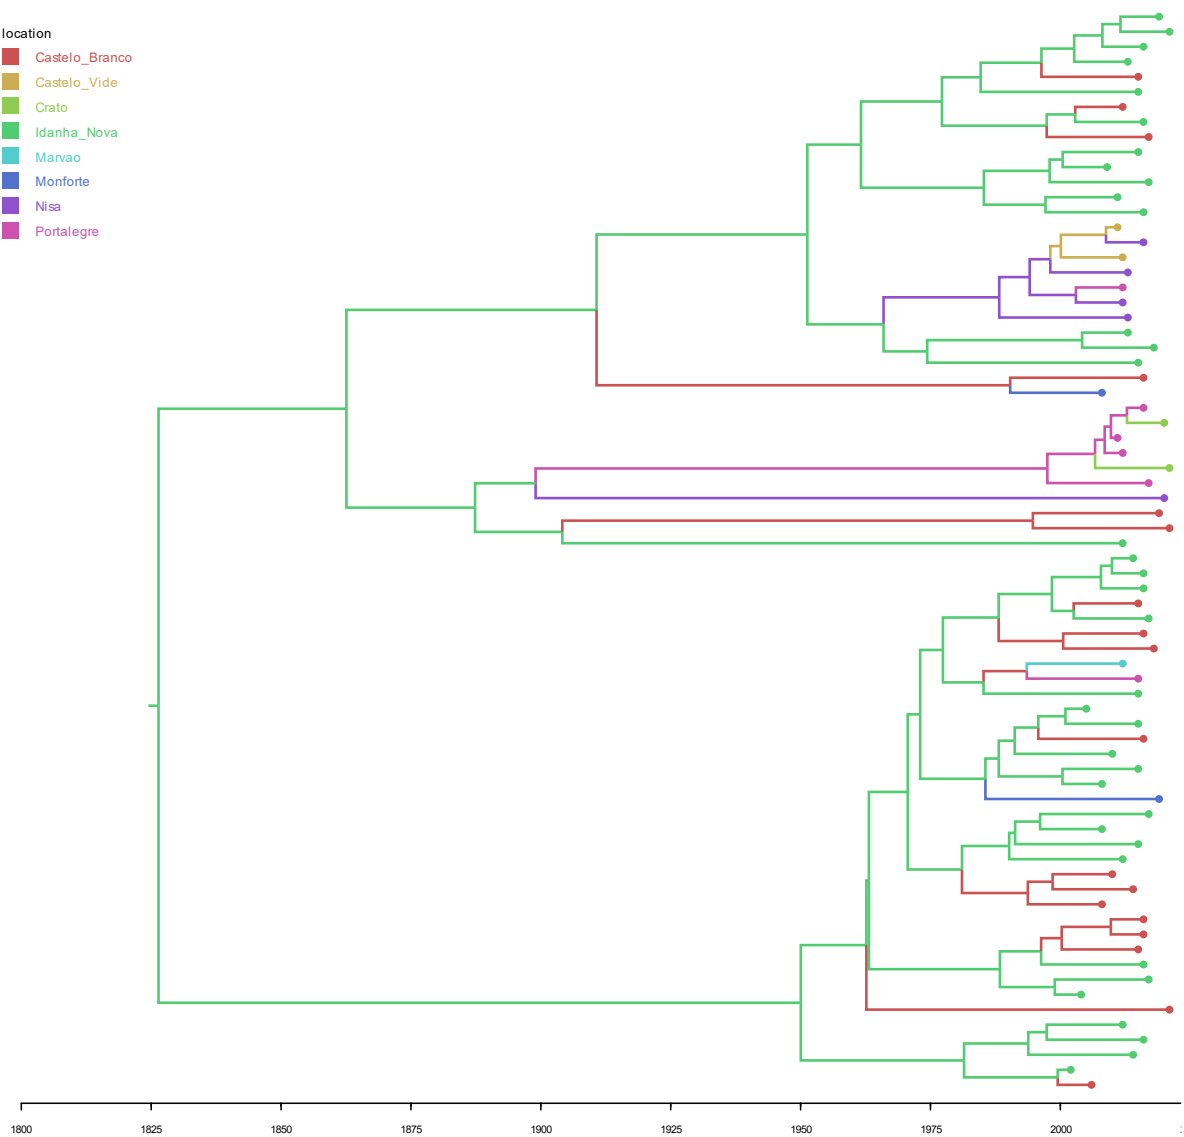

Supplement: Supplementary file [file 1]
